# Supplementary material for: One-pot synthesis of high-molecular-weight aliphatic polycarbonates via melt transesterification of diphenyl carbonate and diols using Zn(OAc)2 as a catalyst
Source: Royal Society of Chemistry journal article supplement (doi:10.1039/c5ra18275a), 2015-01-01
Supplement: c5ra18275a1.pdf [file c5ra18275a1.pdf]

## Supporting Information

# One-pot Synthesis of High-Molecular-Weight Aliphatic Polycarbonates via Melt Transesterification of Diphenyl Carbonate and Diol using $\text{Zn}(\text{OAc})_2$ as Catalyst

Ziqing Wang<sup>1,2,3</sup>, Xiangui Yang<sup>1,2</sup>, Jing Hu<sup>1</sup>, Hua Zhang<sup>1</sup>, and Gongying Wang<sup>1,2</sup>

(<sup>1</sup>Chengdu Institute of Organic Chemistry, Chinese Academy of Sciences, Chengdu 610041, Sichuan, China )

(<sup>2</sup> Changzhou Institute of Chemistry, Changzhou 213164, Jiangsu, China)

(<sup>3</sup>University of Chinese Academy of Sciences, Beijing 100049, China)

Corresponding author: wanggongying1102@126.com

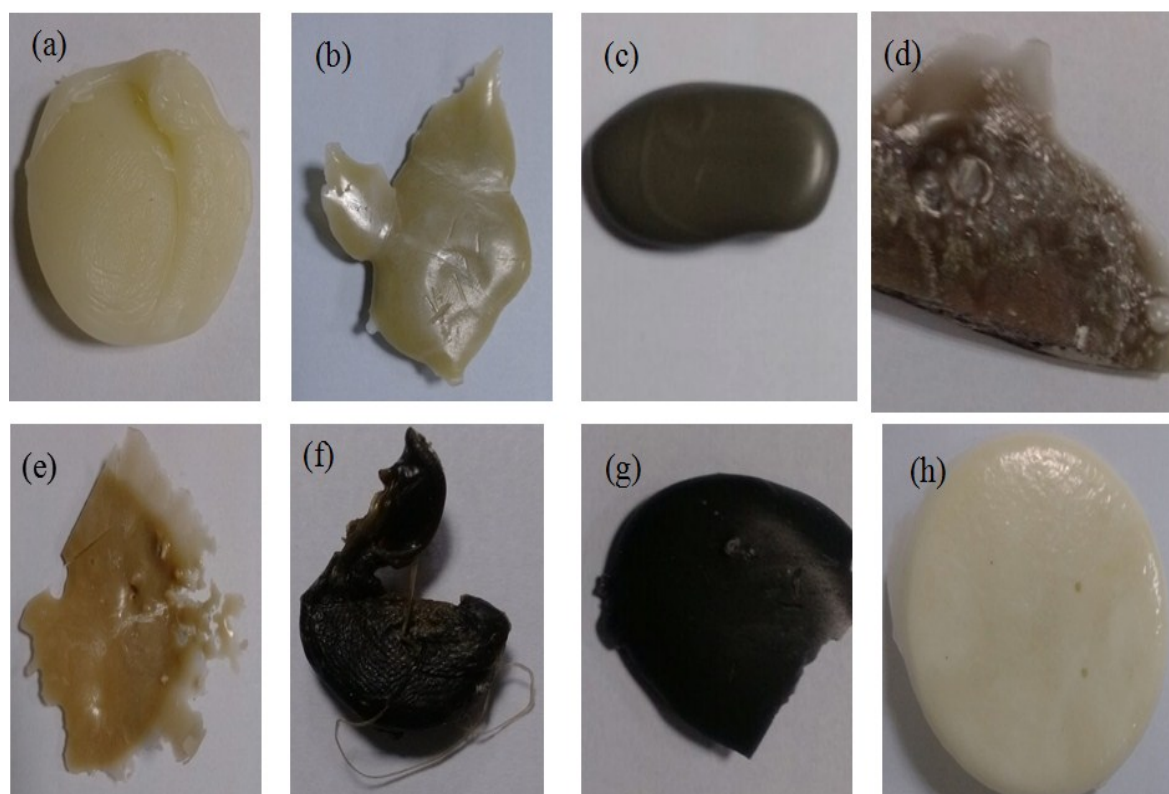

**Fig S1** The color of PBC synthesized over various transition metal acetates catalysts (a)  $\text{Zn}(\text{OAc})_2$  (b)  $\text{Pb}(\text{OAc})_2$  (c)  $\text{Cd}(\text{OAc})_2$  (d)  $\text{Cu}(\text{OAc})_2$  (e)  $\text{Mn}(\text{OAc})_2$  (f)  $\text{Co}(\text{OAc})_2$  (g)  $\text{Ni}(\text{OAc})_2$  and (h)  $\text{Zn}(\text{OAc})_2 \cdot 2\text{H}_2\text{O}$

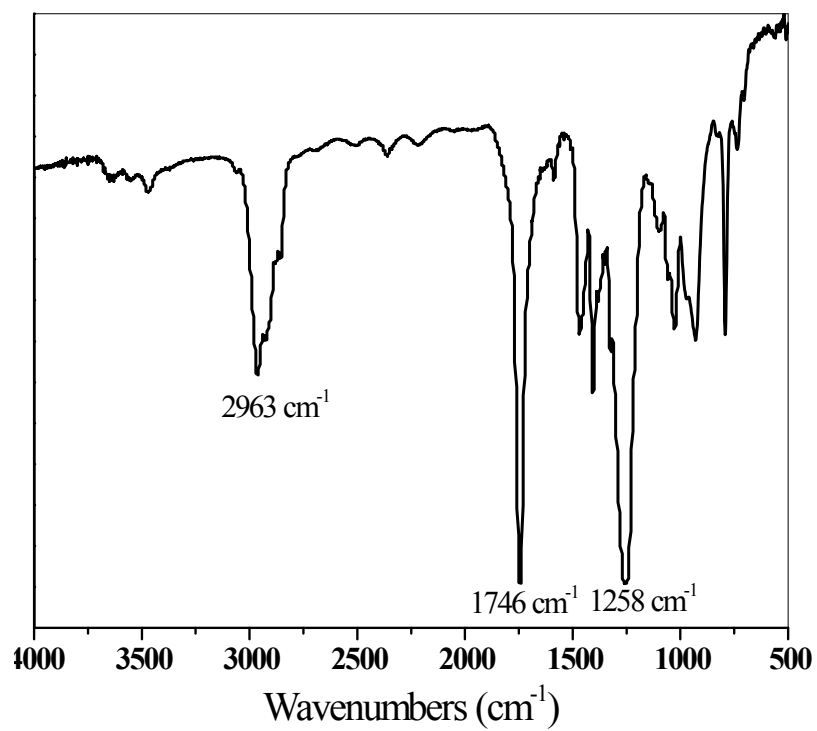

**Fig S2** The FT-IR spectrum of PBC synthesized via one-pot route over Zn(OAc)<sub>2</sub> catalysts

(a)

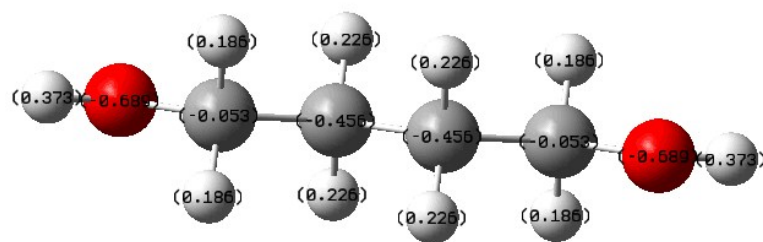

(b)

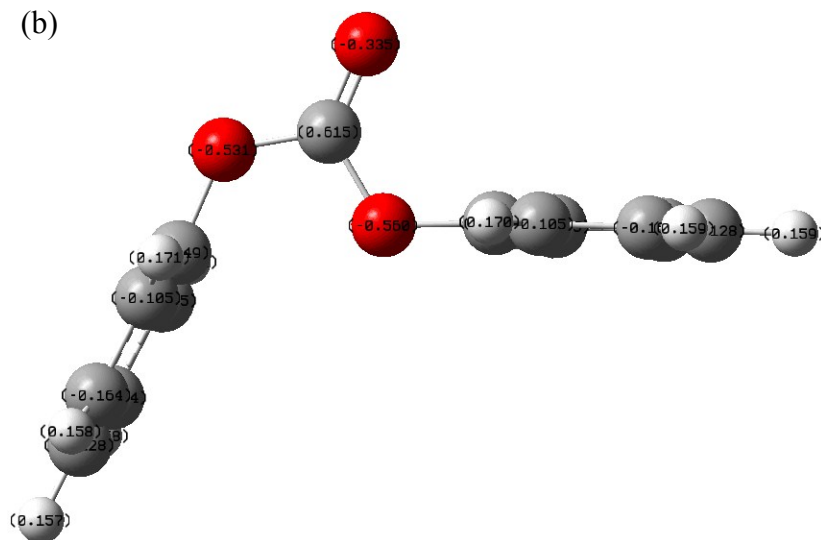

**Fig S3** The optimized structures and charge analysis of (a) BD and (b) DPC
